# Supplementary material for: Association between maternal adversity, DNA methylation, and cardiovascular health of offspring: a longitudinal analysis of the ALSPAC cohort study
Source: HighWire-hosted journal article supplement (doi:10.1136/bmjopen-2021-053652), 2022-03-01
Supplement: bmjopen-2021-053652supp003_data_supplement.pdf [file bmjopen-2021-053652supp003_data_supplement.pdf]

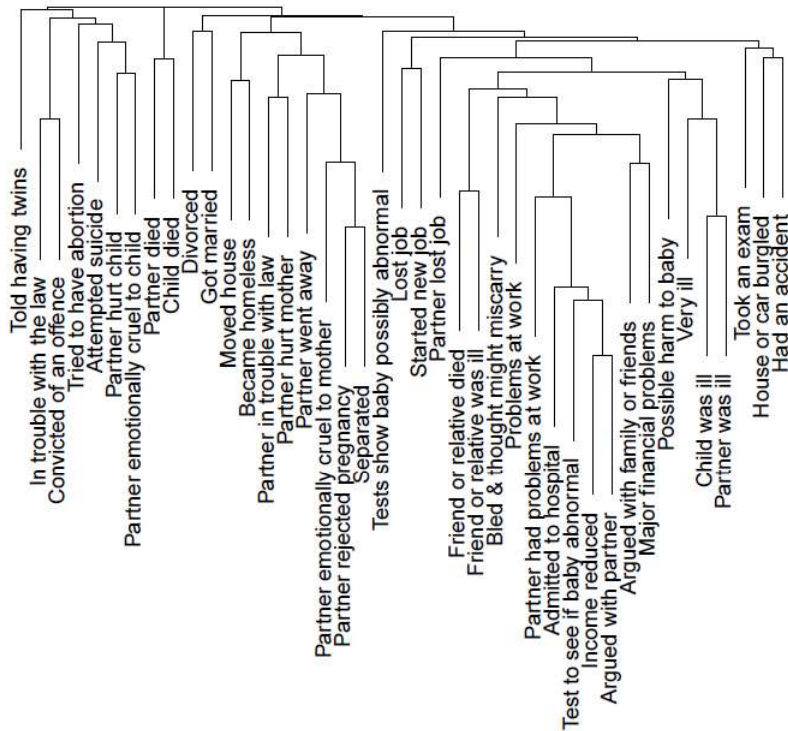

Supplementary Figure S3: Dendrogram of specific life events clusters
